# Supplementary material for: Assessment of Live Lactobacilli Recovery from Probiotic Products for Vaginal Application
Source: MDPI journal article supplement (doi:10.3390/applmicrobiol3040082), 2023-10-14
Supplement: s1 [file s1]

## Supplementary Materials

**Table S1.** Main characteristics of the probiotic products studied.

| Tradename          | Dosage Form      | Species                    | Claim of Viable Cells per Unit | Other Active Substances and Excipients                                                                                                                                                     | Manufacturer (Country) |
|--------------------|------------------|----------------------------|--------------------------------|--------------------------------------------------------------------------------------------------------------------------------------------------------------------------------------------|------------------------|
| Baciginal Activ®   | Vaginal tablets  | <i>L. acidophilus</i>      | 10 <sup>9</sup>                | Lactic acid, mannitol, croscarmellose sodium, vegetal magnesium stearate                                                                                                                   | NTC (Italy)            |
| Baciginal Is®      | Vaginal tablets  | <i>L. acidophilus</i>      | 5 × 10 <sup>8</sup>            | Lactic acid, soy extract standardized to 40% isoflavones, mannitol, starch, carboxymethyl cellulose, glycerol behenate and silicon dioxide                                                 | NTC (Italy)            |
| Gynoflor®          | Vaginal tablets  | <i>L. acidophilus</i>      | 10 <sup>7</sup>                | Estriol, lactose, microcrystalline cellulose, magnesium stearate, sodium starch glycolate and disodium hydrogenphosphate.                                                                  | Medinova (Switzerland) |
| Gynophilus®        | Vaginal capsules | <i>L. rhamnosus</i>        | 10 <sup>9</sup>                | Lactose monohydrate                                                                                                                                                                        | Probionov (Austria)    |
| Isadin α barcilus® | Vaginal capsules | <i>L. plantarum</i> P17630 | 10 <sup>8</sup>                | Medium chain triglycerides, colloidal silica; Coating: gelatine, glycerol, dimethylpolysiloxane AK 1000, titanium dioxide E171, p-oxybenzoate sodium acetate, sodium propyl p-oxybenzoate. | Proge Farme (Italy)    |
| Pregyn-S®          | Vaginal tablets  | <i>L. acidophilus</i>      | 5 × 10 <sup>8</sup>            | Lactic acid, soy isoflavones, mannitol, starch, carboxymethyl cellulose, glycerol behenate and silicon dioxide.                                                                            | S.I.I.T.(Italy)        |
